# Supplementary figures and images for: Inhibition of Nwd1 activity attenuates neuronal hyperexcitability and GluN2B phosphorylation in the hippocampus
Source: PubMed Central journal article supplement — eBioMedicine. 2019 Aug 29;47:470–83. doi: 10.1016/j.ebiom.2019.08.050 (PMC6796588; doi:10.1016/j.ebiom.2019.08.050), 2019-08-29

**a**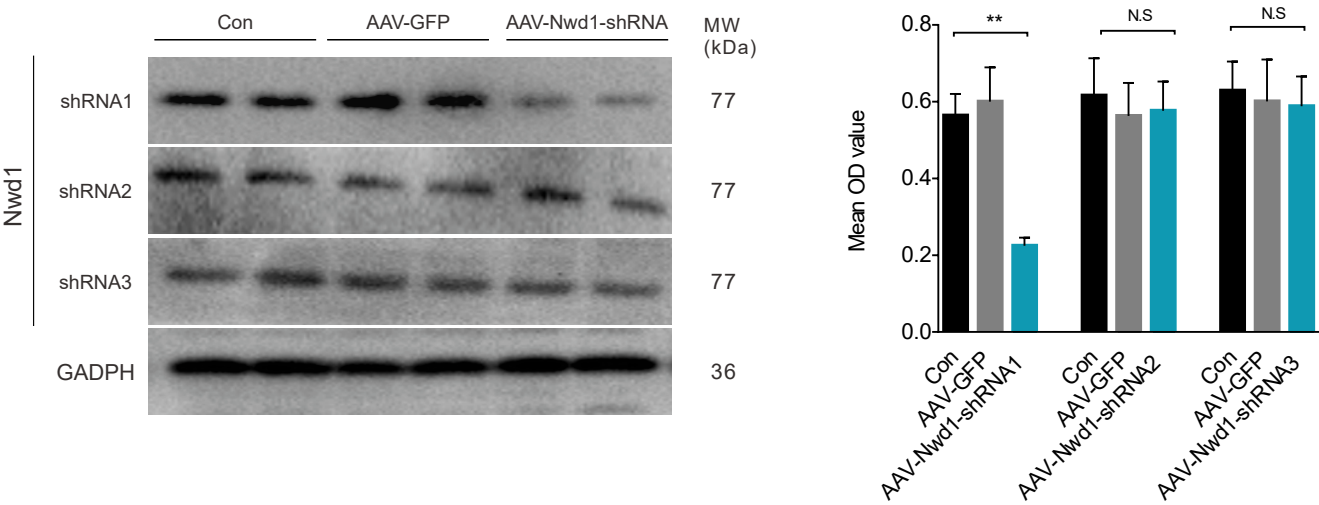**b**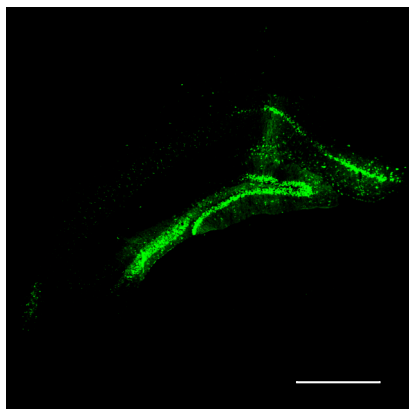**c**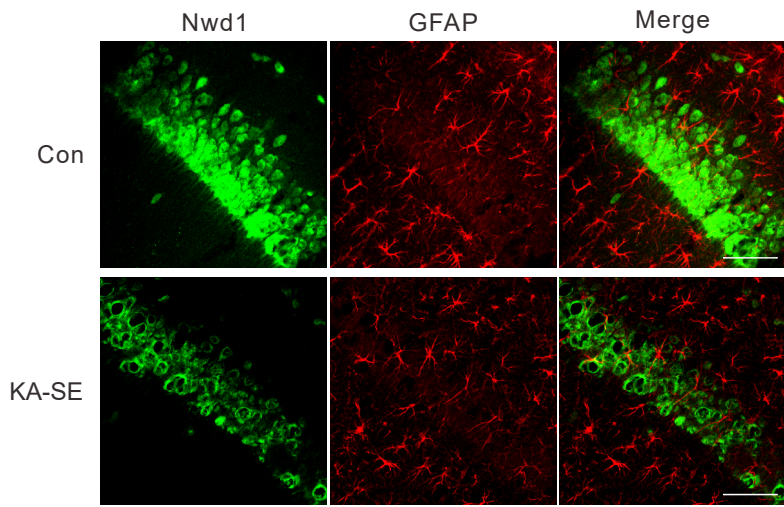

Supplement: mmc1.pdf [file mmc1.pdf]

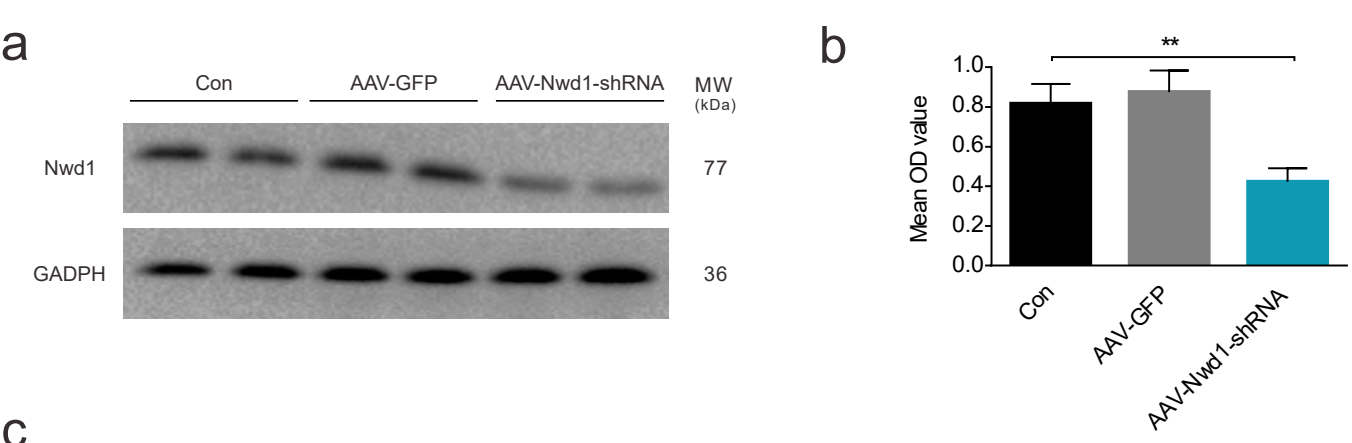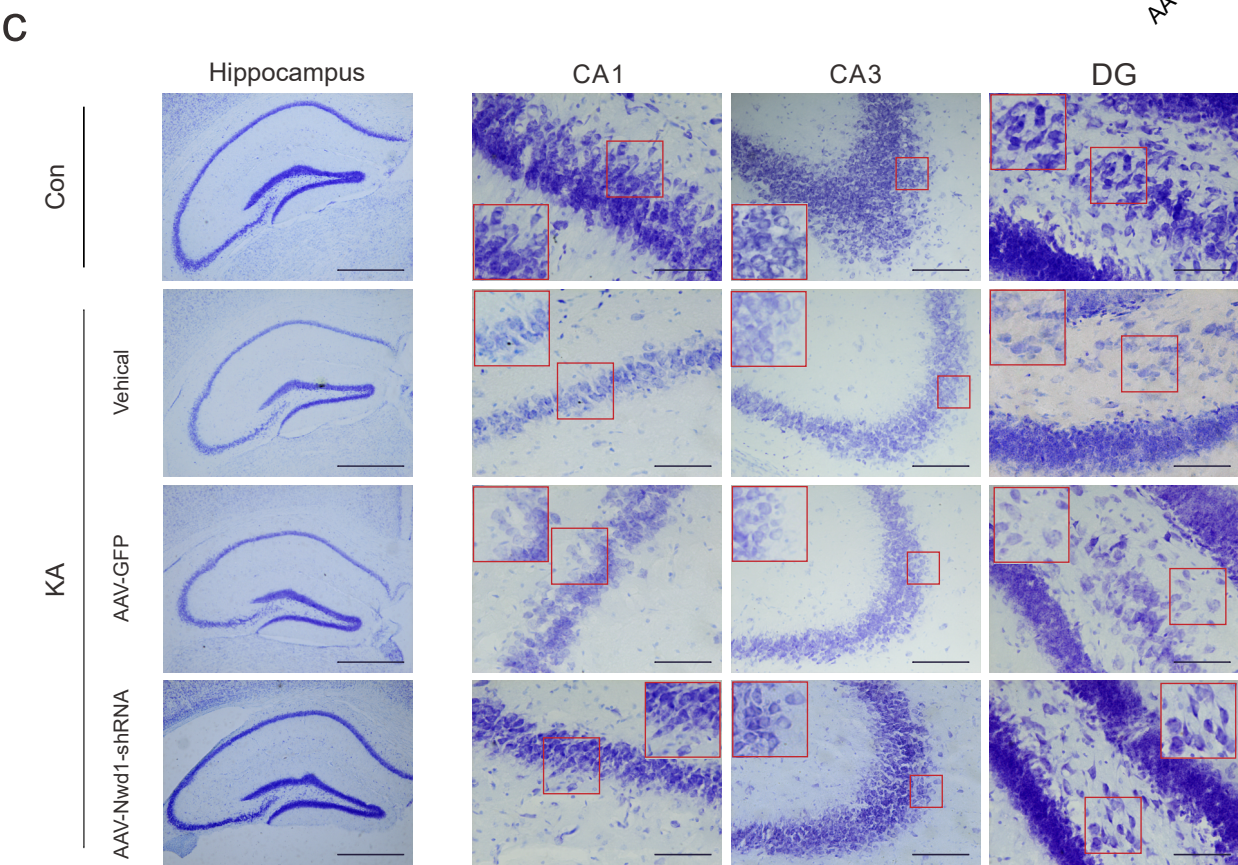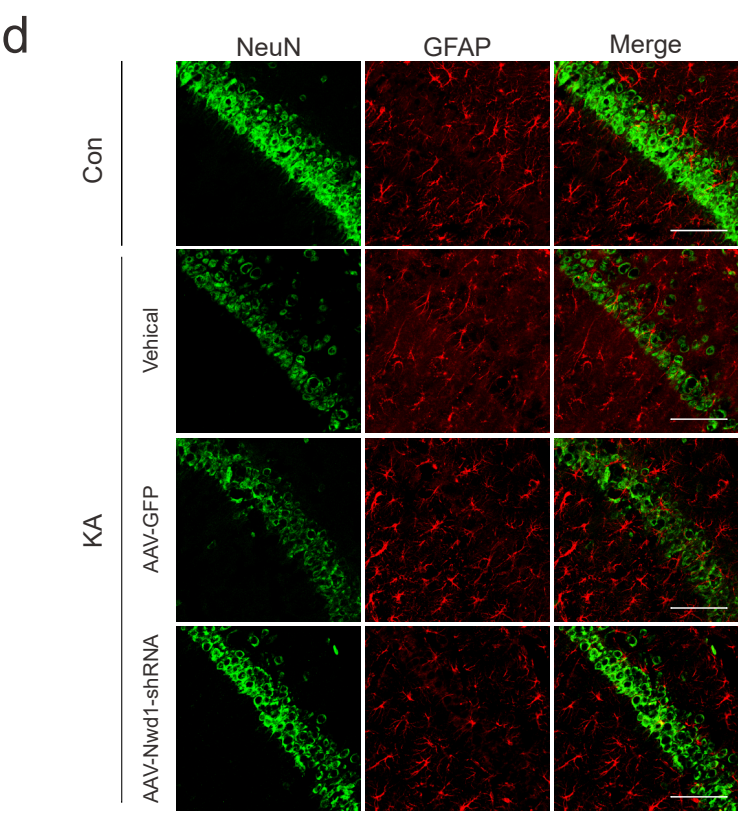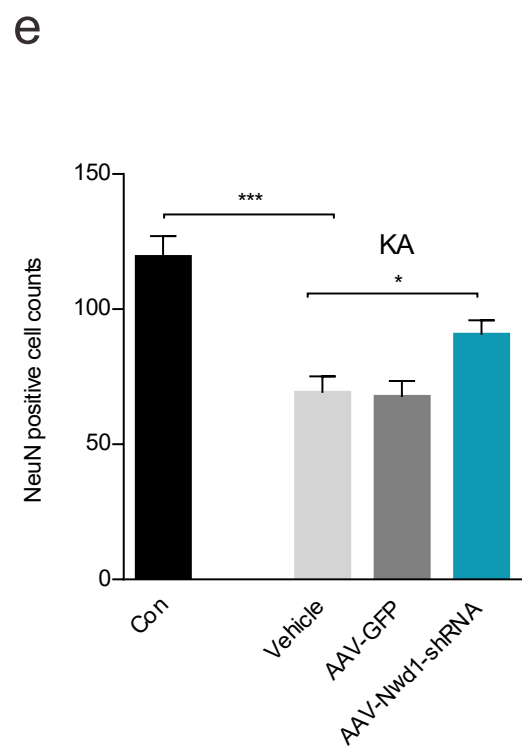

Supplement: mmc2.pdf [file mmc2.pdf]
